# Supplementary material for: Choosing proper normalization is essential for discovery of sparse glycan biomarkers
Source: Royal Society of Chemistry journal article supplement (doi:10.1039/c9mo00174c), 2020-03-10
Supplement: c9mo00174c1.xlsx [file c9mo00174c1.xlsx]

## Sheet: simulation parameters
glycan	mean (raw Orkney)	mean (log raw Orkney)	sd (raw Orkney)	sd (log raw Orkney)
GP1	1633.39	7.24535	992.898	0.554952
GP2	8966.04	8.82846	8815.44	0.728761
GP3	4686.83	8.34868	2165.6	0.463904
GP4	354447	12.6058	204274	0.616143
GP5	4101.07	8.22591	1746.32	0.446332
GP6	83582.6	11.1588	49442.8	0.615408
GP7	9045.16	8.93025	6317.21	0.601554
GP8	369677	12.6999	171212	0.519892
GP9	173979	11.9377	82260.5	0.542571
GP10	94956.8	11.3335	46551.6	0.531736
GP11	12554.1	9.312	6004.31	0.530909
GP12	12770.4	9.2496	8760.62	0.649976
GP13	6643.11	8.69793	2965.26	0.470385
GP14	285400	12.3993	156295	0.600169
GP15	30396.1	10.1828	15545.9	0.554406
GP16	63482.9	10.9228	30936	0.55647
GP17	16657.4	9.5903	8430.87	0.534601
GP18	212953	12.0992	119661	0.613847
GP19	39967.3	10.4493	20794.9	0.572909
GP20	6483.16	8.66769	3123.94	0.475877
GP21	13119.6	9.35603	6434.22	0.526793
GP22	2299.16	7.58556	1686.68	0.556577
GP23	35753.5	10.2891	22780.4	0.6567
GP24	39676.2	10.4074	29975.3	0.621178
